# Supplementary material for: Type of Primary Nb5Si3 and Precipitation of Nbss in αNb5Si3 in a Nb-8.3Ti-21.1Si-5.4Mo-4W-0.7Hf (at.%) Near Eutectic Nb-Silicide-Based Alloy
Source: PubMed Central journal article supplement (PMC6024954; doi:10.3390/ma11060967), 2018-06-07
Supplement: materials-11-00967-s001.pdf [file materials-11-00967-s001.pdf]

Table S1: Summary of microstructures in arc melted, suction cast and OFZ alloy CM1

| Alloy<br>CM1-                 | Condition                                                                                                                             |                                                                                                                                       |
|-------------------------------|---------------------------------------------------------------------------------------------------------------------------------------|---------------------------------------------------------------------------------------------------------------------------------------|
|                               | As cast                                                                                                                               | Heat treated                                                                                                                          |
| 10 g                          | $Nb_{ss}$ , $\beta Nb_5Si_3$<br>$Nb_{ss} + \beta Nb_5Si_3$ eutectic                                                                   | $Nb_{ss}$ , $\alpha Nb_5Si_3$<br>$Nb_{ss} + \alpha Nb_5Si_3$ lamellar microstructure<br>subgrains in $Nb_5Si_3$ and fine precipitates |
| 6mm                           | $Nb_{ss}$ , $\beta Nb_5Si_3$<br>$Nb_{ss} + \beta Nb_5Si_3$ eutectic                                                                   | $Nb_{ss}$ , $\alpha Nb_5Si_3$<br>$Nb_{ss} + \alpha Nb_5Si_3$ lamellar microstructure<br>subgrains in $Nb_5Si_3$ and fine precipitates |
| 8mm                           | $Nb_{ss}$ , $Nb_3Si$ , $\beta Nb_5Si_3$<br>$Nb_{ss} + \beta Nb_5Si_3$ eutectic<br>$Nb_3Si \rightarrow Nb_{ss} + \alpha Nb_5Si_3$      | $Nb_{ss}$ , $\alpha Nb_5Si_3$<br>$Nb_{ss} + \alpha Nb_5Si_3$ lamellar microstructure<br>subgrains in $Nb_5Si_3$ and fine precipitates |
| 600 g                         | $Nb_{ss}$ , $\alpha Nb_5Si_3$<br>$Nb_{ss} + \alpha Nb_5Si_3$ lamellar microstructure<br>subgrains in $Nb_5Si_3$ and fine precipitates | $Nb_{ss}$ , $\alpha Nb_5Si_3$<br>$Nb_{ss} + \alpha Nb_5Si_3$ lamellar microstructure<br>subgrains in $Nb_5Si_3$ and precipitates      |
| OFZ<br>All<br>growth<br>rates | $Nb_{ss}$ , $\alpha Nb_5Si_3$<br>$Nb_{ss} + \alpha Nb_5Si_3$ lamellar microstructure<br>Fine precipitates in $\alpha Nb_5Si_3$        | $Nb_{ss}$ , $\alpha Nb_5Si_3$<br>$Nb_{ss} + \alpha Nb_5Si_3$ lamellar microstructure<br>subgrains in $Nb_5Si_3$ and fine precipitates |

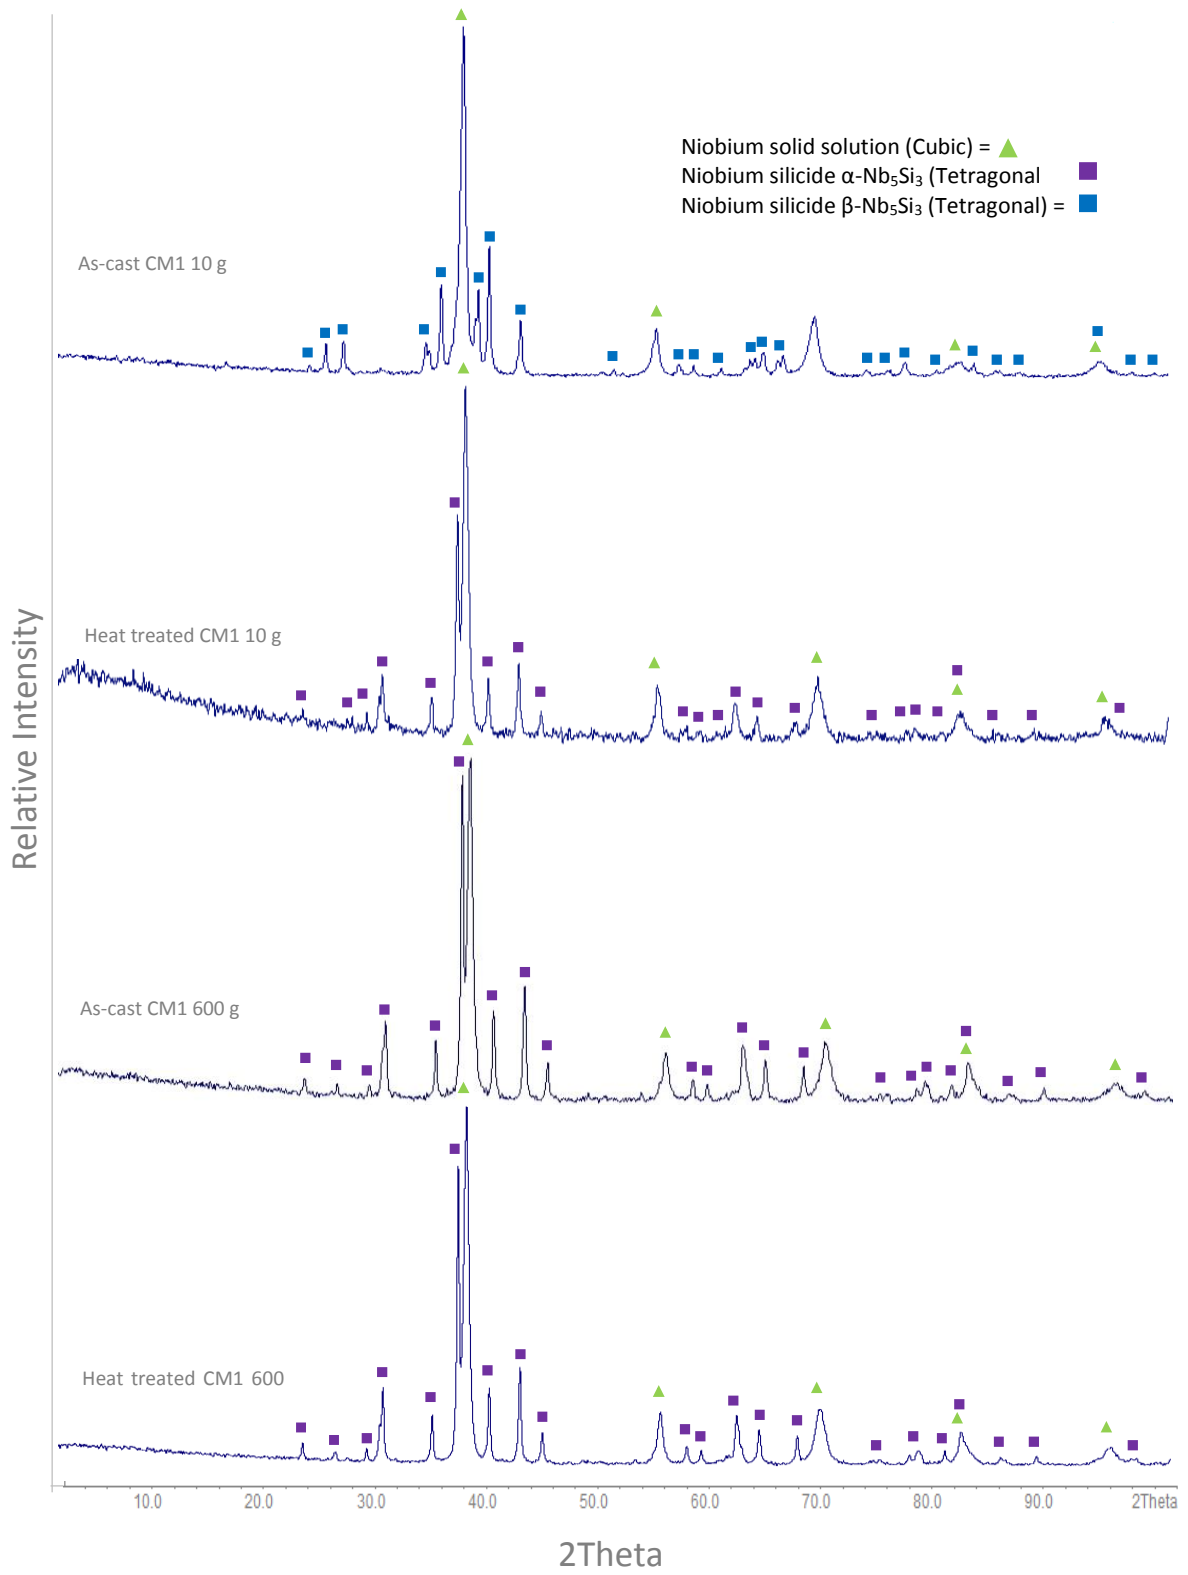

Figure S1: X-ray diffractograms of cast and heat treated CM1-10g and CM1-600g

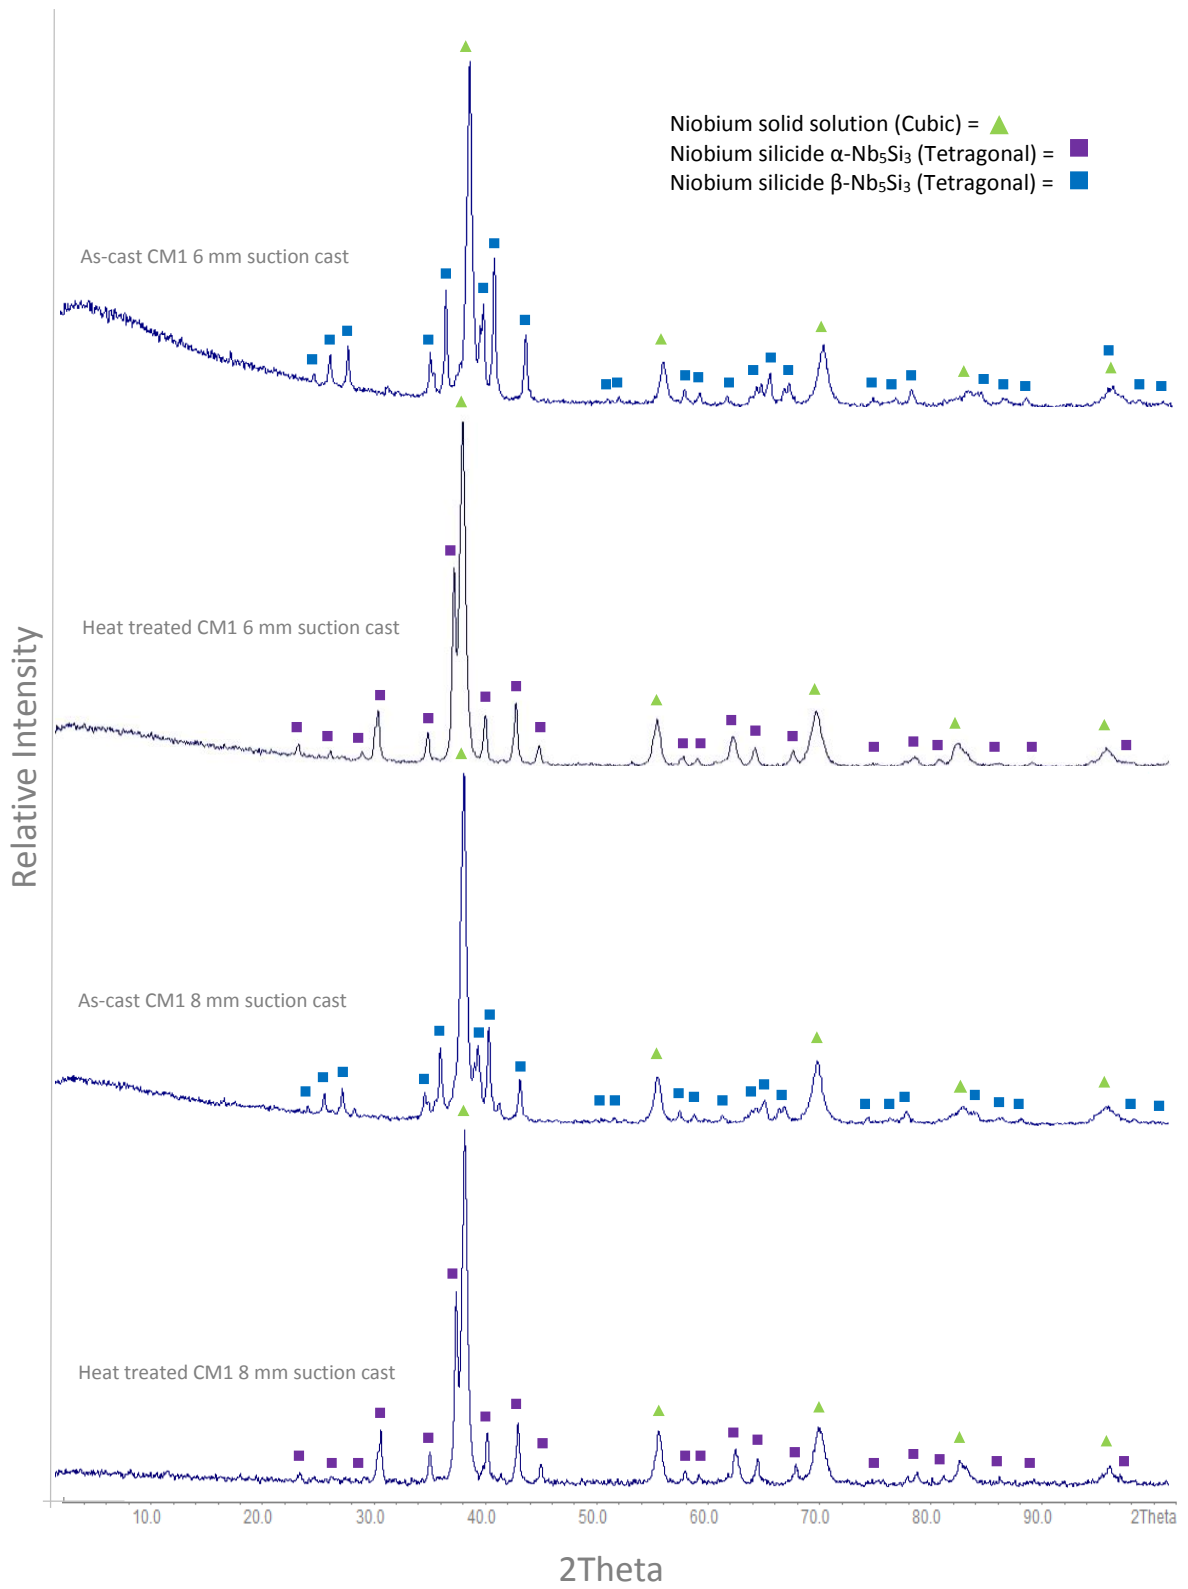

Figure S2: X-ray diffractograms of cast and heat treated CM1-6mm and CM1-8 mm bars

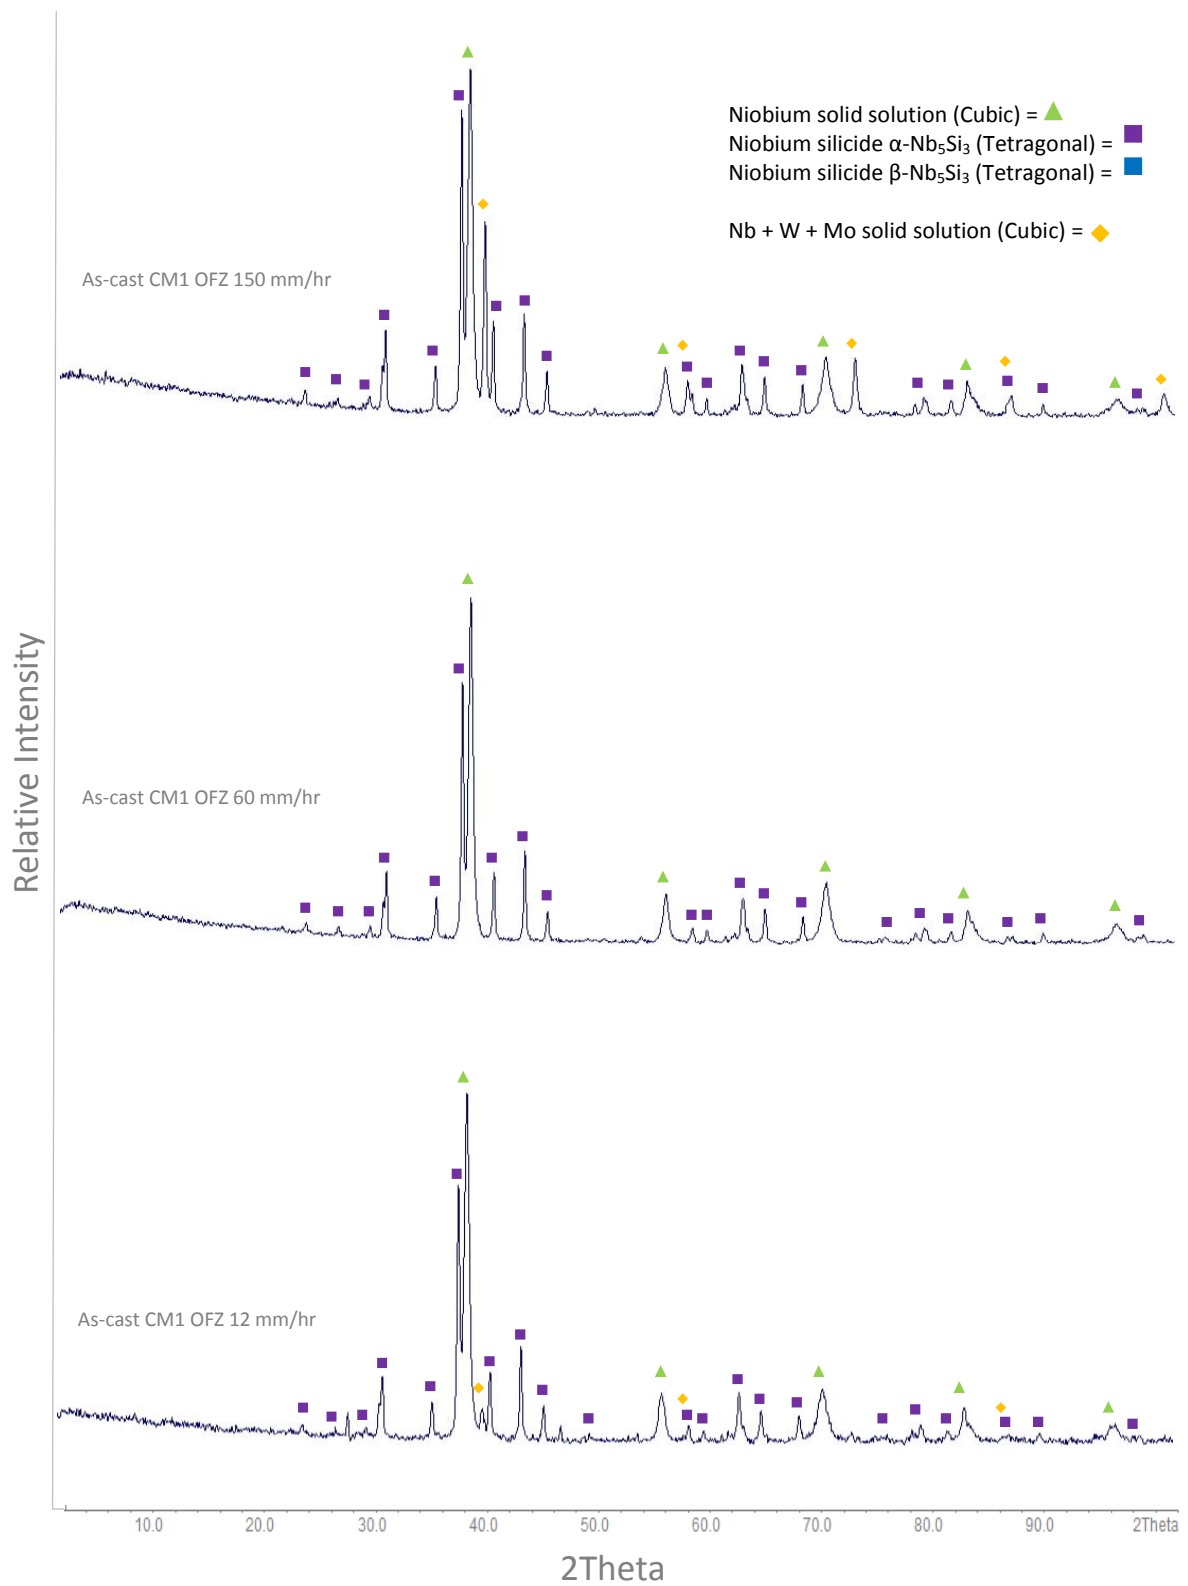

Figure S3: X-ray diffractograms of cast CM1-OFZ grown at growth rates of 12, 60 and 150 mm/h.

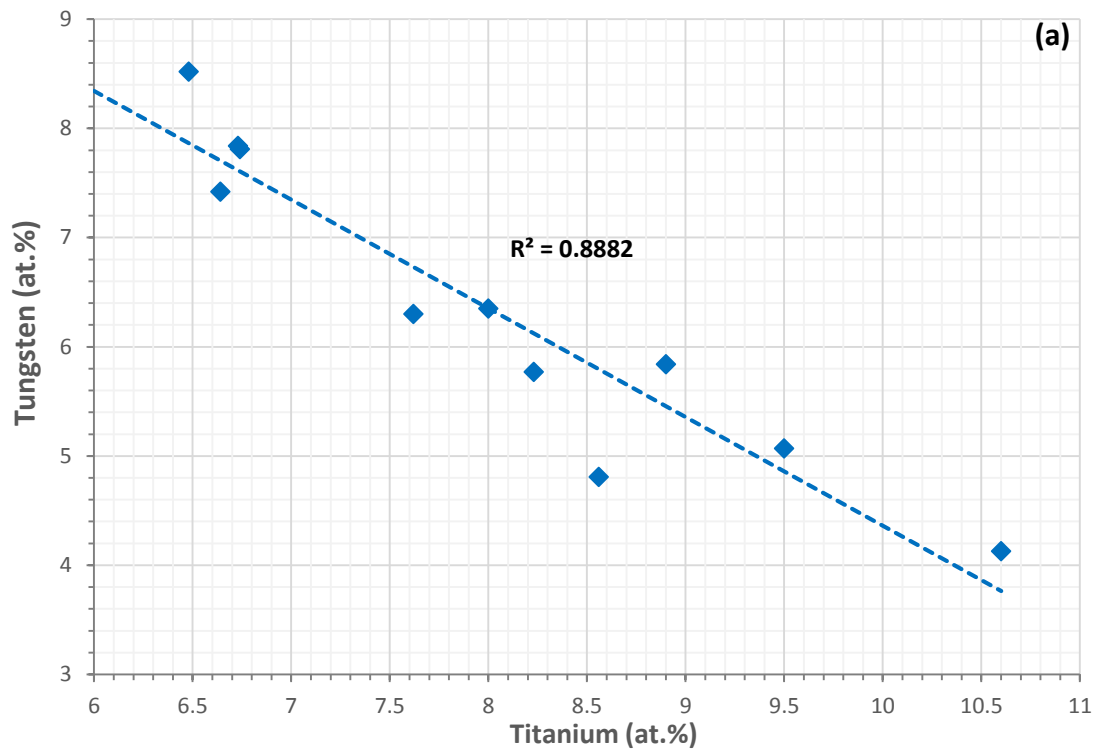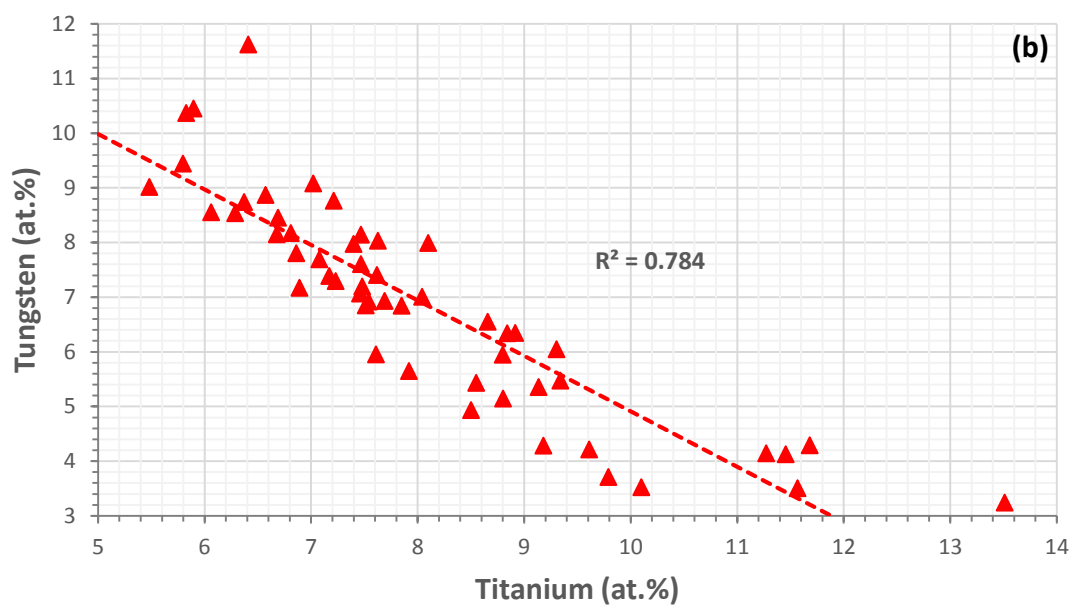

Figure S4: Relationships between W and Ti concentrations in the Nb<sub>ss</sub> (a) in as-cast CM1-10g and (b) CM1-OFZ where data for all three growth rates is included.

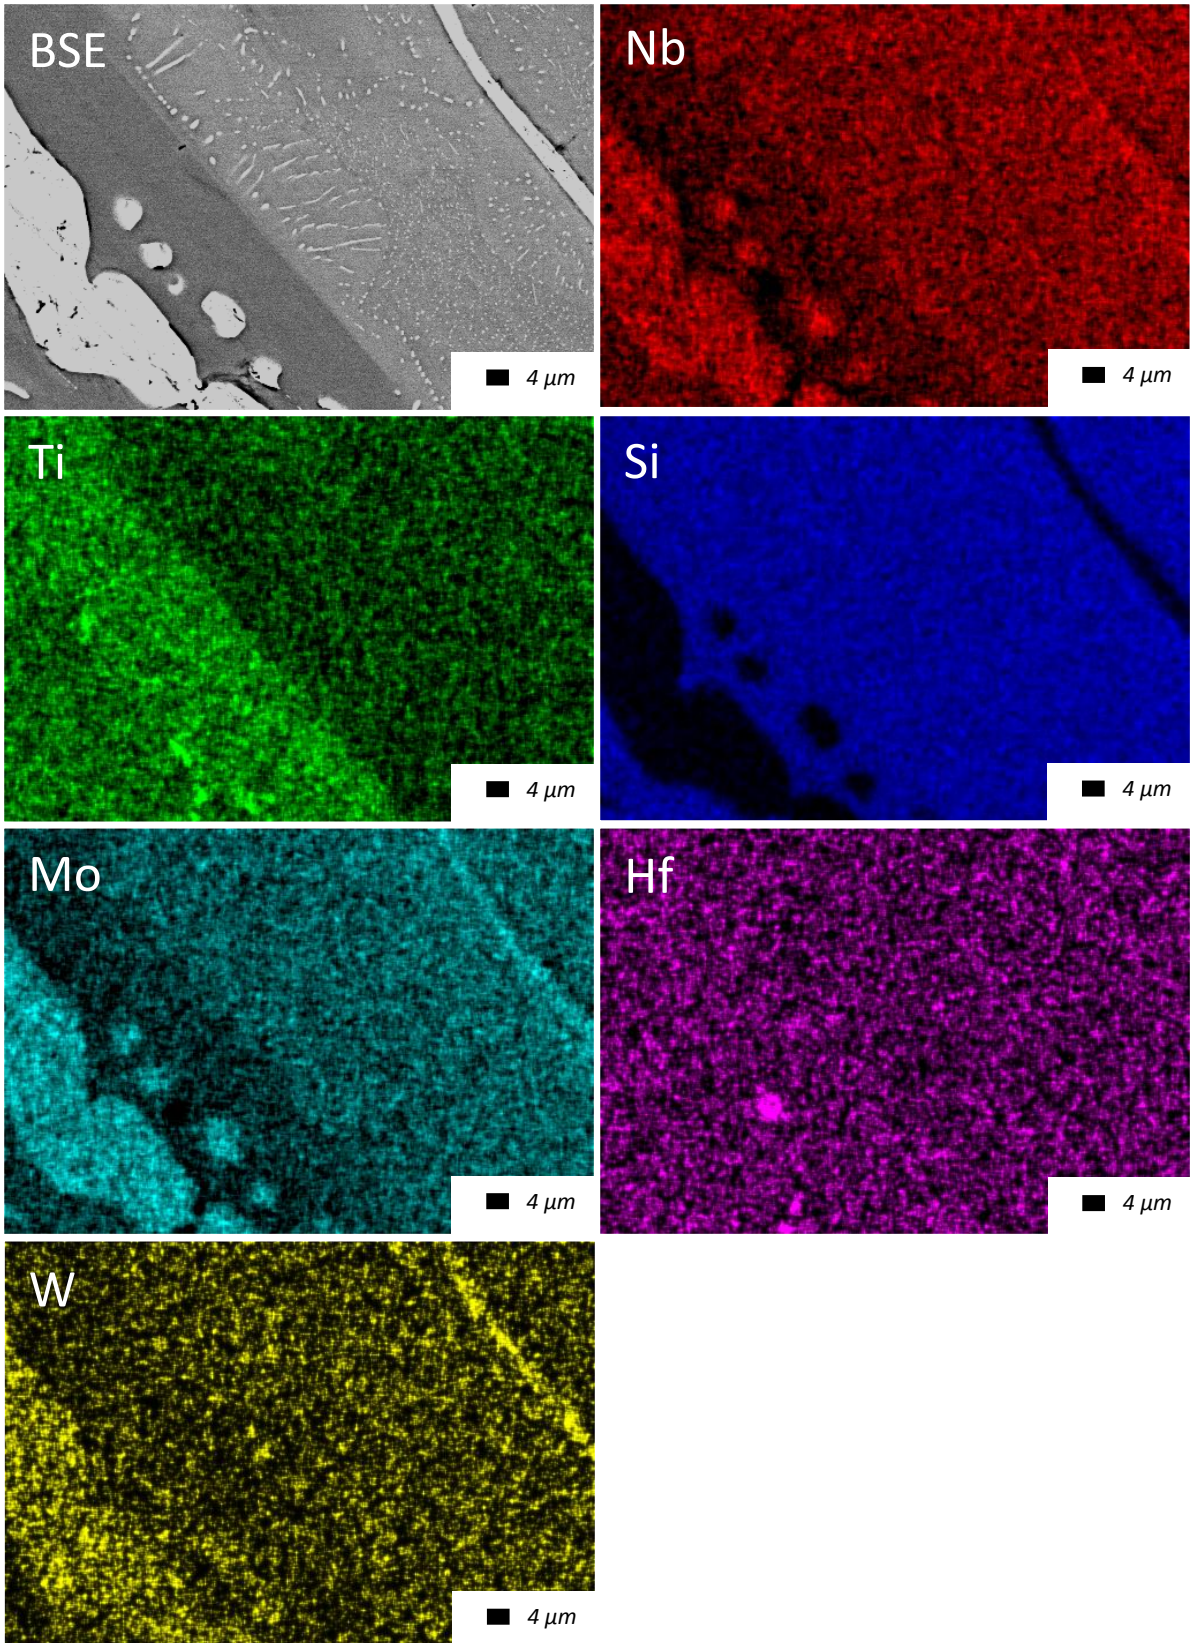

Figure S5: Backscattered electron image of a silicide in as-cast CM1-OFZ grown at 150 mm/hr and X-ray maps of the elements in the alloy.

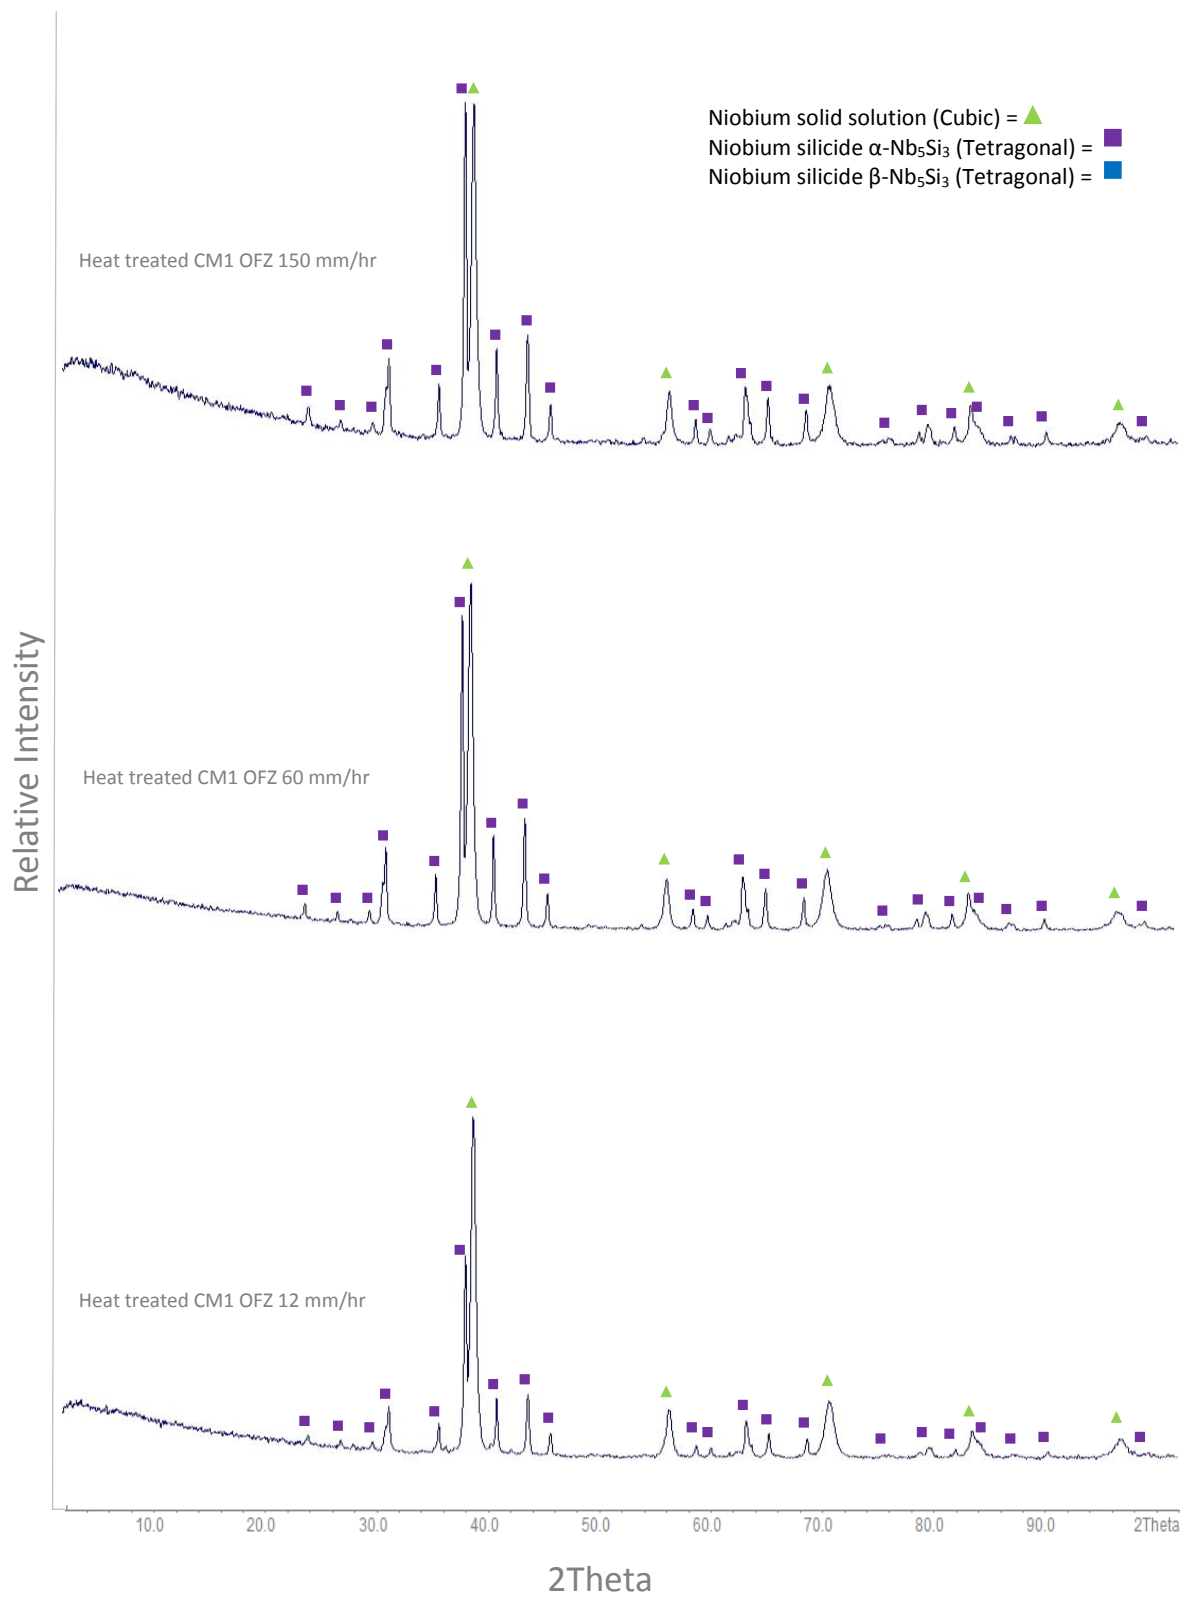

Figure S6: X ray diffractograms of heat treated CM1-OFZ grown at 12, 60 and 150 mm/h
